# Supplementary material for: Neuromedin B Drives Goat Granulosa Cell Proliferation via NMBR-Mediated Calcium Homeostasis
Source: Research Square preprint supplement (doi:10.21203/rs.3.rs-6811713/v1), 2025-07-01
Supplement: Supplementary file 1 [file a746c110fc4a0cc9c26291d8.docx]

**Table S1. Nucleotide sequence of PCR primers and PCR conditions.**

| **Genes** | **Primer sequence (5’- 3’)** | **PCR conditions** | **Product size (bp)** |
| --- | --- | --- | --- |
| *NMB* | F: GTGCACCTGAACCAACCAT | 95 °C 5 min, (98 °C 10 s, 56 °C 30 s, 72 °C 35s) 40 cycles, 72 °C 7 min | 580 |
| R: CACAACTTCAACAGGGAAGC |
| *NMBR* | F: GTTAGTTGCATTCTTCTGGCC | 95 °C 5 min, (98 °C 10 s, 56 °C 30 s, 72 °C 75s) 40 cycles, 72 °C 7 min | 1314 |
| R: TAATTGCTCAGTTCTGTTCTACTCA |
| *GRPR* | F: GAAACAGCAATTCAGGGCAC | 95 °C 5 min, (98 °C 10 s, 56 °C 30 s, 72 °C 70s) 40 cycles, 72 °C 7 min | 1254 |
| R: GGTTCCTCACCAGCCATAAA |

**Table S2. Accession number of NMB and its receptors amino acid sequence.**

| **Items** | **NMB accession number** | **NMBR accession number** | **GRPR accession number** |
| --- | --- | --- | --- |
| Capra hircus | [XP_005695057.1](https://www.ncbi.nlm.nih.gov/protein/548512950) | [XP_005684910.2](https://www.ncbi.nlm.nih.gov/protein/1062885632) | XP_005701117.1 |
| [Ovis aries](https://www.ncbi.nlm.nih.gov/data-hub/taxonomy/9940/?utm_source=nuccore&utm_medium=referral&utm_campaign=KnownItemSensor:taxname) | XP_004017815.1 | [XP_004011431.3](https://www.ncbi.nlm.nih.gov/protein/2062926850) | XP_004021984.1 |
| [Bos taurus](https://www.ncbi.nlm.nih.gov/data-hub/taxonomy/9913/?utm_source=nuccore&utm_medium=referral&utm_campaign=KnownItemSensor:taxname) | XP_010815246.1 | [NP_001192639.1](https://www.ncbi.nlm.nih.gov/protein/329664366) | NP_001179668.1 |
| [Homo sapiens](https://www.ncbi.nlm.nih.gov/data-hub/taxonomy/9606/?utm_source=nuccore&utm_medium=referral&utm_campaign=KnownItemSensor:taxname) | AAH08603.1 | NP_002502.2 | NP_005305.1 |
| [Mus musculus](https://www.ncbi.nlm.nih.gov/data-hub/taxonomy/10090/?utm_source=nuccore&utm_medium=referral&utm_campaign=KnownItemSensor:taxname) | AAH28490.1 | NP_032729.1 | NP_032203.1 |

**Table S3 Primer sequences of genes used for qRT-PCR in this study**

| **Genes** | **Primer sequence (5’→3’)** | **Accession number** | **Product size (bp)** |
| --- | --- | --- | --- |
| *NMB* | F：ACGCTATTAATCAGGAAGACACGA  R：ATACGGCAGGGACAGCATTT | XM_005695000.3 | 258 |
| *NMBR* | F：ACGCATTGGCAGCTTGGATA  R：CGTTTCCGTGTTTCCATCTGTTTT | XM_005684853.3 | 219 |
| *GRPR* | F：TGTCAAGAAGCAGATCGAGTCCAG  R：TAGTGGTAGGAGCGGTACAGGTAG | XM_005701060.2 | 120 |
| *PCNA* | F：AGTGGCGTGAACCTACAGAG  R：GCCAAGGTGTCCGCATTATC | XM_005688167.3 | 203 |
| *GAPDH* | F：CCGTTCGACAGATAGCCGTAA | XM_005680968.3 | 296 |
| R：AGGATCTCGCTCCTGGAAGAT |

**Table S4 Details of antibodies used in this study**

| **Antibodies** | **Cat NO.** | **Source** | **Dilution for**  **WB** | **Dilution for**  **IHC** | **Dilution for**  **IF** |
| --- | --- | --- | --- | --- | --- |
| NMB | 10888-1-AP | Proteintech | 1:200 | 1:250 | 1:100 |
| NMBR | CSB-PA080188 | Cusabio | 1:500 | 1:250 | 1:100 |
| GRPR | CSB-PA156499 | Cusabio | 1:250 | 1:100 | 1:50 |
| PCNA | ab18197 | Abcam | 1:1000 | − | − |
| CDK1 | 19532-1-AP | Proteintech | 1:500 | − | − |
| CDK2 | A0094 | ABclonal | 1:1000 | − | − |
| CDK6 | bs-0633R | Bioss | 1:500 | − | − |
| CCNE1 | A22360 | ABclonal | 1:1000 | − | − |
| PLCβ1 | 26551-1-AP | Proteintech | 1:1000 | − | − |
| IP3R | DF3000 | LTD | 1:2000 | − | − |
| SERCA1 | DF4449 | LTD | 1:500 | − | − |
| ATF6 | DF7576 | LTD | 1:2000 | − | − |
| ERp57 | DF6230 | LTD | 1:1000 | − | − |
| p-IRE1α | AF7150 | LTD | 1:1000 | − | − |
| XBP1S | 24868-1-AP | Proteintech | 1:2000 | − | − |
| BIP | 11587-1-AP | Proteintech | 1:4000 | − | − |
| p-PERK | DF7576 | LTD | 1:2000 | − | − |
| EIF2A | AF6087 | LTD | 1:1000 | − | − |
| p-EIF2A | AF3087 | LTD | 1:1000 | − | − |
| ATF4 | 10835-1-AP | Proteintech | 1:500 | − | − |
| p-ATF4 | AF5436 | LTD | 1:500 | − | − |
| OPA1 | 27733-1-AP | ProteinTech | 1:1000 | − | − |
| MFN1 | 13798-1-AP | ProteinTech | 1:4000 | − | − |
| MFN2 | 12186-1-AP | ProteinTech | 1:1000 | − | − |
| FIS1 | 10956-1-AP | ProteinTech | 1:2000 | − | − |
| DNM1L | 12957-1-AP | ProteinTech | 1:1000 | − | − |
| IRE1α | A21021 | ABclonal | 1:2000 | − | − |
| VDAC1 | A19707 | ABclonal | 1:1000 | − | − |
| GAPDH | 60004-1-Ig | ProteinTech | 1:8000 | − | − |
| HRP-conjugated Donkey Anti-Rabbit IgG(H+L) | SA00001-9 | ProteinTech | 1:10000 | − | − |
| HRP-conjugated Donkey Anti-Mouse IgG(H+L) | SA00001-8 | ProteinTech | 1:10000 | − | − |

WB: Western blot, IHC: immunohistochemistry, IF: immunofluorescence, (−): absent

**Table S5.** **Sequences of siRNA template oligonucleotides used in this study.**

| Name | Sense (5’-3’) | Antisense (5'-3') |
| --- | --- | --- |
| siXBP1S-1 | AGCCCGCUGCUUCCGCCGGTT | CCGGCGGAAGCAGCGGGCUTT |
| siXBP1S-2 | CAGGCGCGCAAGCGACAGCTT | GCUGUCGCUUGCGCGCCUGTT |
| siXBP1S -3 | GGAGCAGCAAGUGGUAGAUTT | AUCUACCACUUGCUGCUCCTT |
| siXBP1S -4 | GGACUCUGAUGGUGUUGACTT | GUCAACACCAUCAGAGUCCTT |
| siNC | UUCUCCGAACGUGUCACGUTT | ACGUGACACGUUCGGAGAATT |

**Supplement Figure**


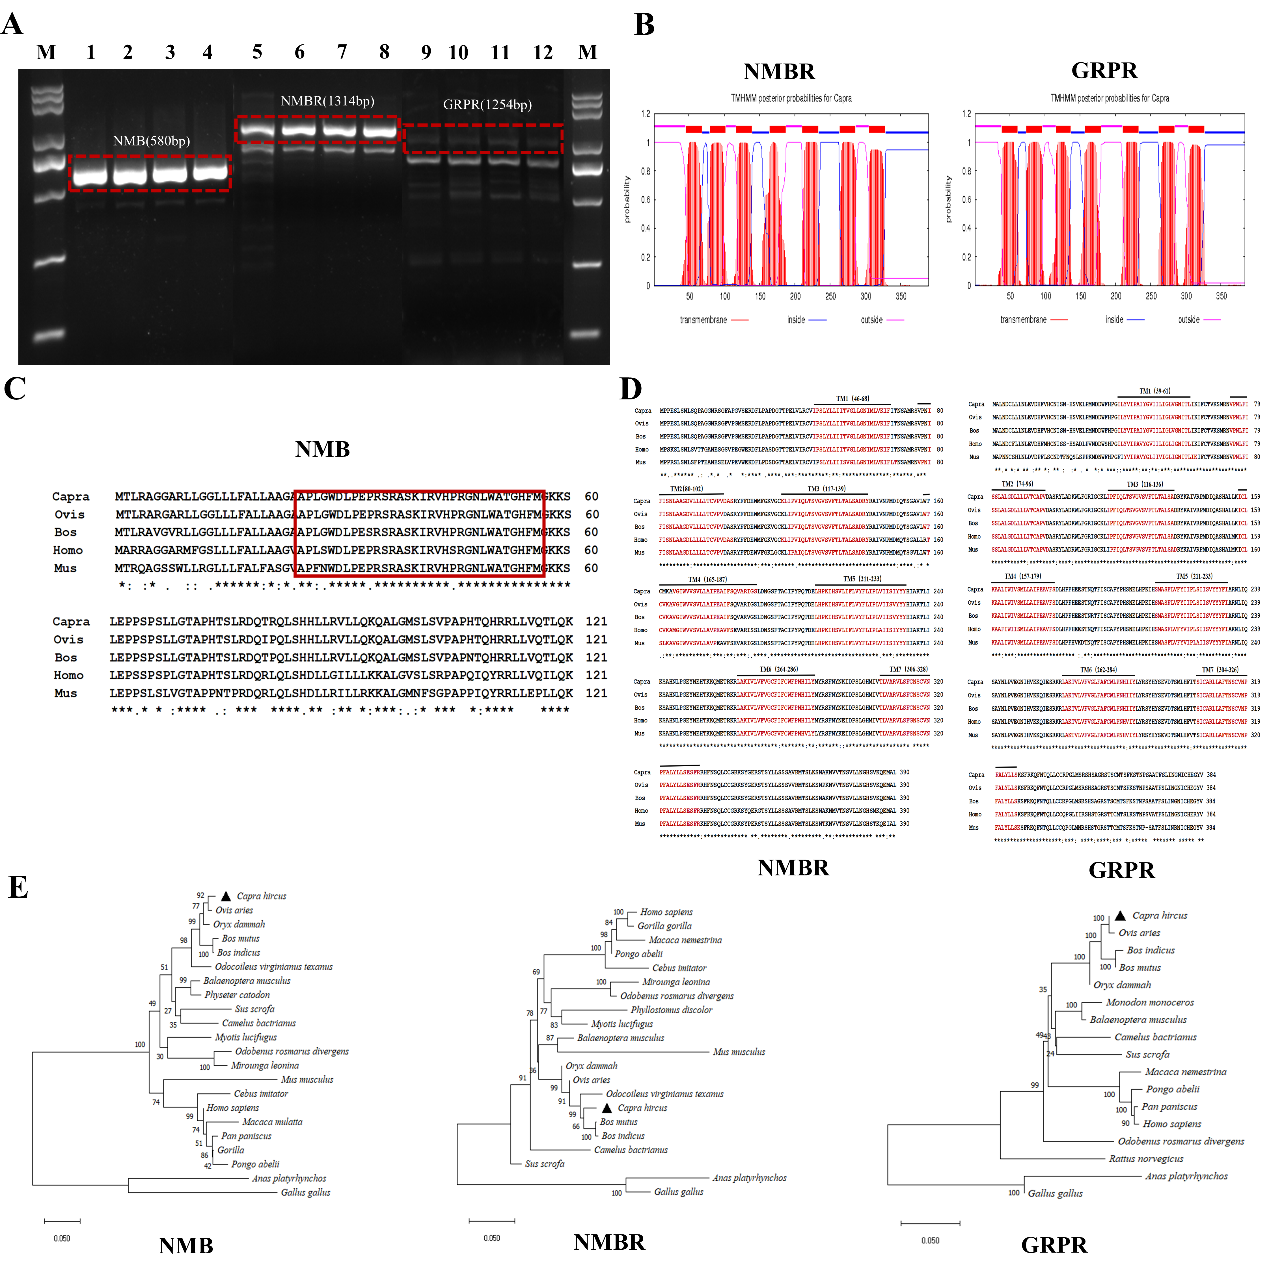


**Figure S1.** **Cloning of NMB and its receptor and sequence analysis.** (A) Gel electrophoresis of goat NMB and its receptor PCR products. Lane 1-4: NMB; Lane 5-8: NMBR; Lane 9-12: GRPR; M: DNA Marker DL 5000. (B) Transmembrane region of the goat NMBR and GRPR amino acid sequence fragment. Multiple alignments of deduced amino-acid sequences of NMB (C), NMBR and GRPR (D) in Ovis aries, Bos taurus, Homo sapiens and Mus musculus. The core structure of NMB binding with its receptors show in the red box. Identifiers: “*” identical, “.” and “:” conservative replacements, “” mismatches. (E) Phylogenetic tree of the goat NMB and its receptor nucleotide sequences.


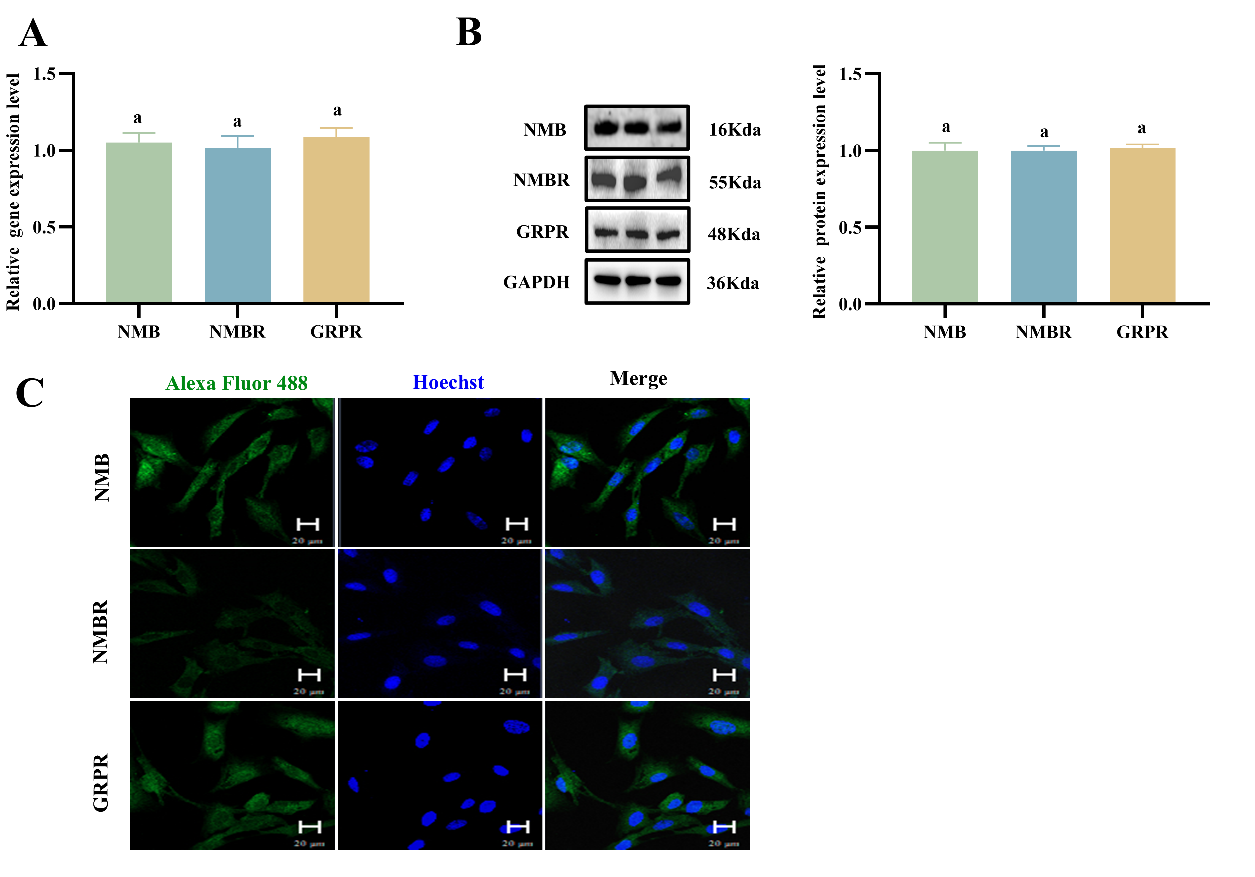


**Figure S2.** **NMB and its receptor are expressed in goat GCs.** (A) The mRNA expression of NMB and its receptors in goat GCs was detected by qRT-PCR. (B) The protein expression of NMB and its receptors in g goat GCs was detected by Western blot. (C) Localization of NMB and its receptors in cultured goat GCs. ​​Blue​​: DAPI-stained nuclei; ​​Green​​: Immunofluorescence signals representing antibody-antigen reactions. Data are expressed as fold changes and presented as mean ± S.E.M. from at least three independent experiments. Different letters indicate significant differences between groups (*p* < 0.05).


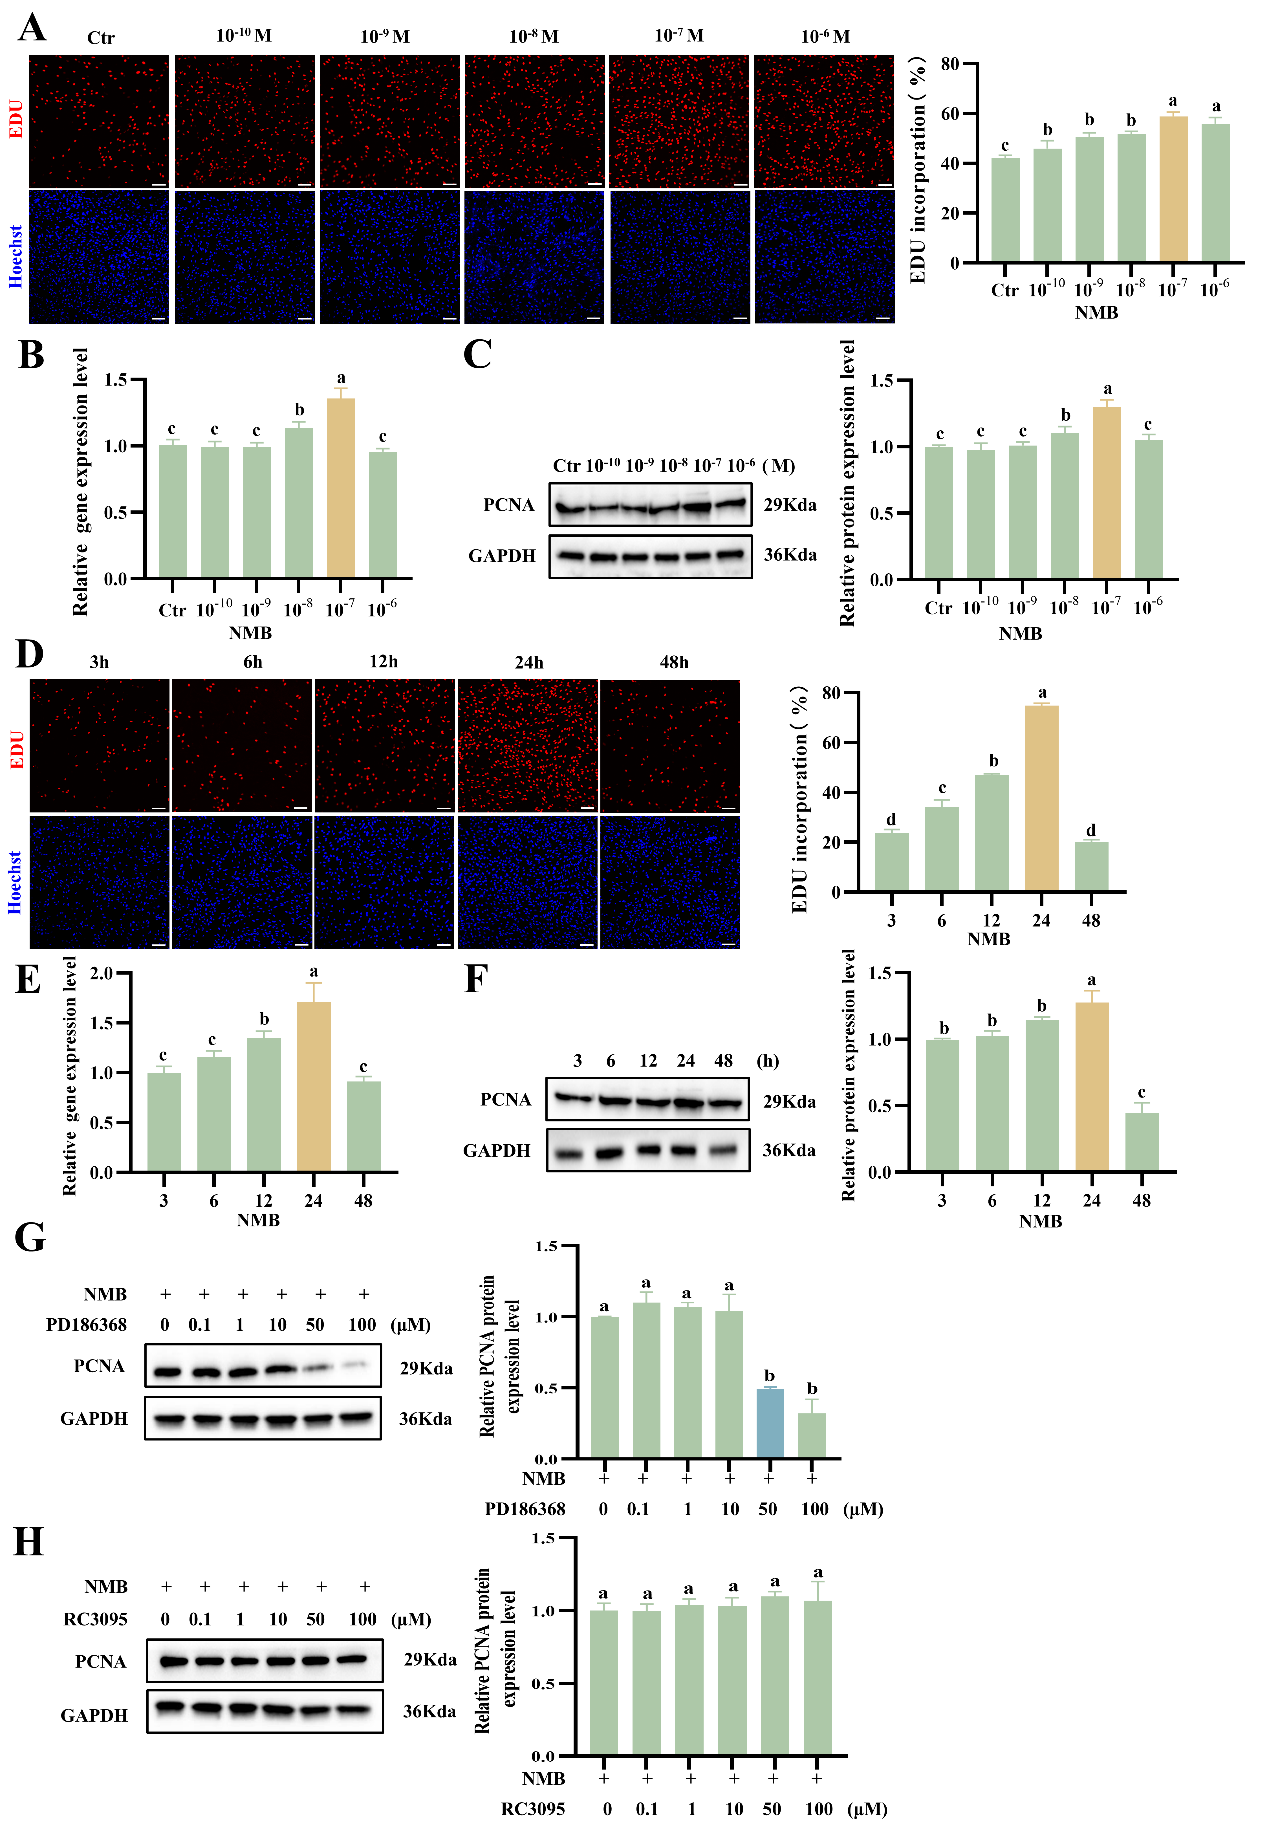


**Figure S3.** **NMB promotes goat GC proliferation via NMBR.** (A) EDU analysis of the proliferation ability of goat GCs under various concentrations of NMB treatment (10−10, 10−9, 10−8, 10−7 and 10−6 M). (B) qRT-PCR and (C) Western blot analysis of PCNA expression levels in goat GCs under NMB treatment with different concentrations. (D) EDU analysis of the proliferation ability of goat GCs under NMB treatment (10−7M) for varying durations (3, 6, 12, 24, and 48 h). (E) qRT-PCR and (F) Western blot analysis of PCNA expression levels in goat GCs under NMB treatment with different durations. (G) Western blot detected the expression level of PCNA in goat GCs treated with different concentrations (0.1, 1, 10, 50 and 100 μM) of the NMBR antagonist PD168368. (H) Western blot detected the expression level of PCNA in goat GCs treated with different concentrations (0.1, 1, 10, 50 and 100 μM) of the GRPR antagonist RC3095. Data are expressed as fold changes and presented as mean ± S.E.M. from at least three independent experiments. Different letters indicate significant differences between groups (*p* < 0.05).


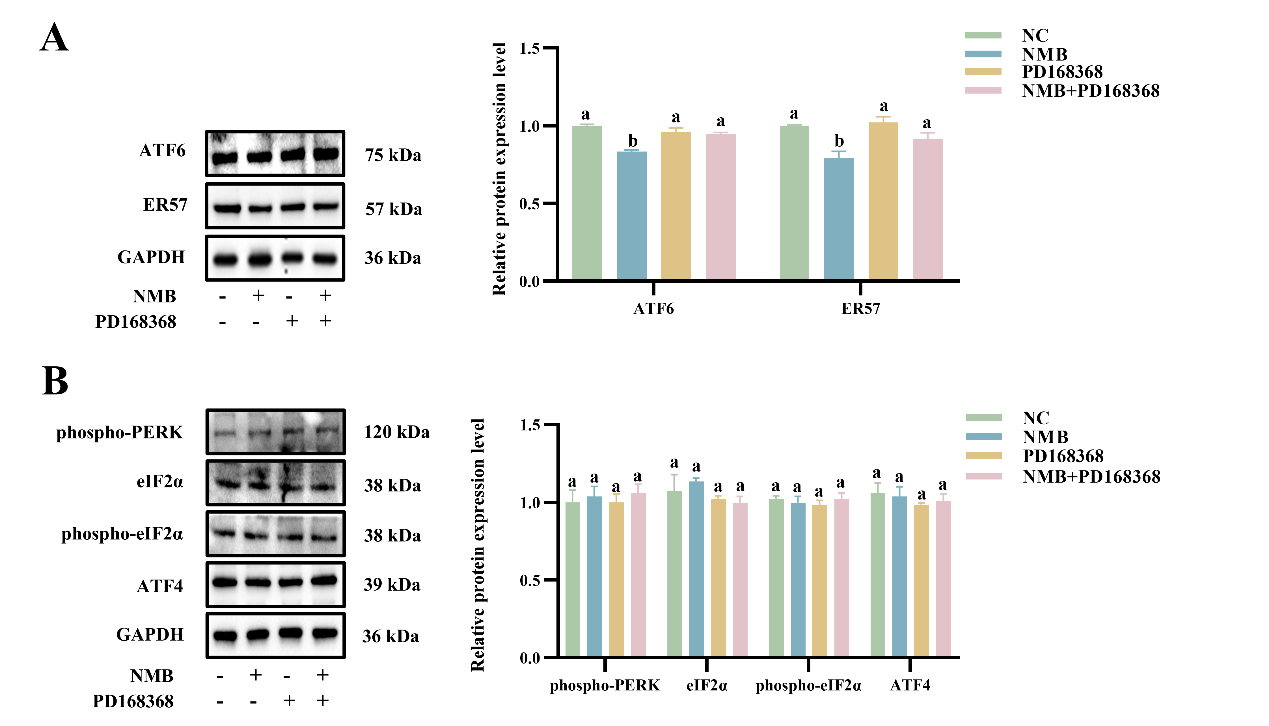


**Figure S4.** **NMB regulates cell proliferation and estrogen production of goat GCs through UPRer.** (A) Western blot analysis of ATF6, and ER57 expression levels in goat GCs under NMB treatment with or without NMBR antagonism. (B) Western blot analysis of phospho-PERK, eIf2α, phospho-eIf2α, and ATF4 expression levels in goat GCs under NMB treatment with or without NMBR antagonism. Data are expressed as fold changes and presented as mean ± S.E.M. from at least three independent experiments. Different letters indicate significant differences between groups (*p* < 0.05).
